# Supplementary material for: Visual Affective Stimulus Database: A Validated Set of Short Videos
Source: MDPI journal article supplement (doi:10.3390/bs12050137), 2022-05-09
Supplement: s1 [file s1]

# **Visual Affective Stimulus Database: A Validated Set of Short Videos**

Supplementary Materials

**Table S1. Recognition rate for valence of videos**

|          | N   | Min (%) | Max (%) | Mean (%) |
|----------|-----|---------|---------|----------|
| Positive | 115 | 60.3    | 89.7    | 72.9     |
| Neutral  | 52  | 60.3    | 89.7    | 73.8     |
| Negative | 83  | 60.3    | 96.5    | 80.8     |

**Table S2. The percentage of the recognition rate of all the videos**

| Number | Valence > 5 (%) | Valence = 5 (%) | Valence < 5 (%) |
|--------|-----------------|-----------------|-----------------|
| 1      | 73.28%          | 25.00%          | 1.72%           |
| 2      | 81.90%          | 16.38%          | 1.72%           |
| 3      | 81.90%          | 17.24%          | 0.86%           |
| 4      | 63.79%          | 35.34%          | 0.86%           |
| 5      | 62.93%          | 32.76%          | 4.31%           |
| 6      | 77.59%          | 17.24%          | 5.17%           |
| 7      | 53.45%          | 31.03%          | 15.52%          |
| 8      | 62.07%          | 35.34%          | 2.59%           |
| 9      | 56.03%          | 42.24%          | 1.72%           |
| 10     | 61.21%          | 38.79%          | 0.00%           |
| 11     | 43.97%          | 44.83%          | 11.21%          |
| 12     | 62.07%          | 35.34%          | 2.59%           |
| 13     | 65.52%          | 33.62%          | 0.86%           |
| 14     | 77.59%          | 19.83%          | 2.59%           |
| 15     | 80.17%          | 17.24%          | 2.59%           |
| 16     | 61.21%          | 36.21%          | 2.59%           |
| 17     | 45.69%          | 50.00%          | 4.31%           |
| 18     | 50.86%          | 45.69%          | 3.45%           |
| 19     | 52.59%          | 44.83%          | 2.59%           |
| 20     | 56.03%          | 39.66%          | 4.31%           |
| 21     | 76.72%          | 19.83%          | 3.45%           |
| 22     | 76.72%          | 23.28%          | 0.00%           |
| 23     | 71.55%          | 26.72%          | 1.72%           |
| 24     | 65.52%          | 28.45%          | 6.03%           |
| 25     | 75.86%          | 18.97%          | 5.17%           |
| 26     | 78.45%          | 20.69%          | 0.86%           |
| 27     | 75.00%          | 25.00%          | 0.00%           |
| 28     | 81.90%          | 15.52%          | 2.59%           |
| 29     | 70.69%          | 24.14%          | 5.17%           |
| 30     | 78.45%          | 19.83%          | 1.72%           |
| 31     | 76.72%          | 18.10%          | 5.17%           |
| 32     | 72.41%          | 25.00%          | 2.59%           |
| 33     | 81.03%          | 18.10%          | 0.86%           |
| 34     | 50.86%          | 43.97%          | 5.17%           |
| 35     | 68.10%          | 29.31%          | 2.59%           |
| 36     | 75.00%          | 19.83%          | 5.17%           |
| 37     | 51.72%          | 46.55%          | 1.72%           |
| 38     | 66.38%          | 26.72%          | 6.90%           |

|    |        |        |       |
|----|--------|--------|-------|
| 39 | 50.86% | 43.97% | 5.17% |
| 40 | 68.97% | 31.03% | 0.00% |
| 41 | 65.52% | 34.48% | 0.00% |
| 42 | 70.69% | 28.45% | 0.86% |
| 43 | 68.97% | 30.17% | 0.86% |
| 44 | 64.66% | 32.76% | 2.59% |
| 45 | 57.76% | 38.79% | 3.45% |
| 46 | 63.79% | 35.34% | 0.86% |
| 47 | 68.10% | 28.45% | 3.45% |
| 48 | 73.28% | 24.14% | 2.59% |
| 49 | 71.55% | 24.14% | 4.31% |
| 50 | 71.55% | 24.14% | 4.31% |
| 51 | 80.17% | 18.10% | 1.72% |
| 52 | 75.00% | 23.28% | 1.72% |
| 53 | 71.55% | 25.00% | 3.45% |
| 54 | 72.41% | 25.00% | 2.59% |
| 55 | 52.59% | 43.10% | 4.31% |
| 56 | 74.14% | 23.28% | 2.59% |
| 57 | 72.41% | 24.14% | 3.45% |
| 58 | 61.21% | 38.79% | 0.00% |
| 59 | 62.93% | 35.34% | 1.72% |
| 60 | 80.17% | 17.24% | 2.59% |
| 61 | 62.93% | 35.34% | 1.72% |
| 62 | 81.90% | 16.38% | 1.72% |
| 63 | 83.62% | 14.66% | 1.72% |
| 64 | 56.90% | 37.93% | 5.17% |
| 65 | 74.14% | 23.28% | 2.59% |
| 66 | 55.17% | 41.38% | 3.45% |
| 67 | 67.24% | 26.72% | 6.03% |
| 68 | 75.86% | 21.55% | 2.59% |
| 69 | 76.72% | 18.97% | 4.31% |
| 70 | 81.90% | 14.66% | 3.45% |
| 71 | 74.14% | 23.28% | 2.59% |
| 72 | 68.97% | 27.59% | 3.45% |
| 73 | 70.69% | 26.72% | 2.59% |
| 74 | 74.14% | 23.28% | 2.59% |
| 75 | 75.86% | 22.41% | 1.72% |
| 76 | 75.86% | 21.55% | 2.59% |
| 77 | 71.55% | 20.69% | 7.76% |
| 78 | 71.55% | 24.14% | 4.31% |
| 79 | 75.86% | 22.41% | 1.72% |
| 80 | 70.69% | 21.55% | 7.76% |
| 81 | 63.79% | 34.48% | 1.72% |
| 82 | 69.83% | 27.59% | 2.59% |

|     |        |        |        |
|-----|--------|--------|--------|
| 83  | 62.93% | 28.45% | 8.62%  |
| 84  | 64.66% | 19.83% | 15.52% |
| 85  | 69.83% | 25.86% | 4.31%  |
| 86  | 68.97% | 31.03% | 0.00%  |
| 87  | 62.93% | 32.76% | 4.31%  |
| 88  | 67.24% | 30.17% | 2.59%  |
| 89  | 56.90% | 39.66% | 3.45%  |
| 90  | 72.41% | 27.59% | 0.00%  |
| 91  | 73.28% | 25.86% | 0.86%  |
| 92  | 66.38% | 33.62% | 0.00%  |
| 93  | 70.69% | 25.00% | 4.31%  |
| 94  | 73.28% | 25.86% | 0.86%  |
| 95  | 70.69% | 28.45% | 0.86%  |
| 96  | 63.79% | 34.48% | 1.72%  |
| 97  | 59.48% | 24.14% | 16.38% |
| 98  | 74.14% | 23.28% | 2.59%  |
| 99  | 73.28% | 25.00% | 1.72%  |
| 100 | 78.45% | 18.97% | 2.59%  |
| 101 | 76.72% | 20.69% | 2.59%  |
| 102 | 71.55% | 22.41% | 6.03%  |
| 103 | 73.28% | 22.41% | 4.31%  |
| 104 | 56.03% | 37.93% | 6.03%  |
| 105 | 75.86% | 23.28% | 0.86%  |
| 106 | 74.14% | 25.00% | 0.86%  |
| 107 | 74.14% | 18.97% | 6.90%  |
| 108 | 77.59% | 21.55% | 0.86%  |
| 109 | 74.14% | 21.55% | 4.31%  |
| 110 | 81.03% | 18.10% | 0.86%  |
| 111 | 81.90% | 16.38% | 1.72%  |
| 112 | 83.62% | 13.79% | 2.59%  |
| 113 | 89.66% | 7.76%  | 2.59%  |
| 114 | 81.03% | 15.52% | 3.45%  |
| 115 | 81.90% | 13.79% | 4.31%  |
| 116 | 70.69% | 24.14% | 5.17%  |
| 117 | 68.10% | 26.72% | 5.17%  |
| 118 | 82.76% | 14.66% | 2.59%  |
| 119 | 73.28% | 19.83% | 6.90%  |
| 120 | 78.45% | 16.38% | 5.17%  |
| 121 | 74.14% | 23.28% | 2.59%  |
| 122 | 72.41% | 25.86% | 1.72%  |
| 123 | 73.28% | 25.00% | 1.72%  |
| 124 | 81.03% | 16.38% | 2.59%  |
| 125 | 66.38% | 24.14% | 9.48%  |
| 126 | 83.62% | 14.66% | 1.72%  |

|     |        |        |        |
|-----|--------|--------|--------|
| 127 | 81.03% | 15.52% | 3.45%  |
| 128 | 81.03% | 17.24% | 1.72%  |
| 129 | 85.34% | 13.79% | 0.86%  |
| 130 | 53.45% | 33.62% | 12.93% |
| 131 | 40.52% | 51.72% | 7.76%  |
| 132 | 34.48% | 60.34% | 5.17%  |
| 133 | 22.41% | 74.14% | 3.45%  |
| 134 | 21.55% | 75.86% | 2.59%  |
| 135 | 31.90% | 65.52% | 2.59%  |
| 136 | 33.62% | 62.07% | 4.31%  |
| 137 | 16.38% | 75.00% | 8.62%  |
| 138 | 25.86% | 69.83% | 4.31%  |
| 139 | 21.55% | 70.69% | 7.76%  |
| 140 | 9.48%  | 84.48% | 6.03%  |
| 141 | 9.48%  | 86.21% | 4.31%  |
| 142 | 12.93% | 77.59% | 9.48%  |
| 143 | 25.86% | 68.97% | 5.17%  |
| 144 | 26.72% | 70.69% | 2.59%  |
| 145 | 22.41% | 75.00% | 2.59%  |
| 146 | 17.24% | 80.17% | 2.59%  |
| 147 | 11.21% | 72.41% | 16.38% |
| 148 | 43.10% | 50.00% | 6.90%  |
| 149 | 20.69% | 64.66% | 14.66% |
| 150 | 53.45% | 43.97% | 2.59%  |
| 151 | 33.62% | 51.72% | 14.66% |
| 152 | 14.66% | 73.28% | 12.07% |
| 153 | 54.31% | 42.24% | 3.45%  |
| 154 | 44.83% | 50.00% | 5.17%  |
| 155 | 37.93% | 55.17% | 6.90%  |
| 156 | 28.45% | 68.10% | 3.45%  |
| 157 | 40.52% | 51.72% | 7.76%  |
| 158 | 37.93% | 56.90% | 5.17%  |
| 159 | 32.76% | 58.62% | 8.62%  |
| 160 | 59.48% | 36.21% | 4.31%  |
| 161 | 67.24% | 32.76% | 0.00%  |
| 162 | 45.69% | 50.00% | 4.31%  |
| 163 | 60.34% | 37.93% | 1.72%  |
| 164 | 68.97% | 30.17% | 0.86%  |
| 165 | 54.31% | 40.52% | 5.17%  |
| 166 | 46.55% | 50.00% | 3.45%  |
| 167 | 27.59% | 70.69% | 1.72%  |
| 168 | 25.00% | 62.07% | 12.93% |
| 169 | 50.86% | 43.97% | 5.17%  |
| 170 | 39.66% | 57.76% | 2.59%  |

|     |        |        |        |
|-----|--------|--------|--------|
| 171 | 58.62% | 38.79% | 2.59%  |
| 172 | 14.66% | 81.90% | 3.45%  |
| 173 | 12.93% | 77.59% | 9.48%  |
| 174 | 43.10% | 54.31% | 2.59%  |
| 175 | 12.93% | 77.59% | 9.48%  |
| 176 | 14.66% | 82.76% | 2.59%  |
| 177 | 7.76%  | 89.66% | 2.59%  |
| 178 | 12.93% | 82.76% | 4.31%  |
| 179 | 13.79% | 83.62% | 2.59%  |
| 180 | 15.52% | 81.90% | 2.59%  |
| 181 | 29.31% | 64.66% | 6.03%  |
| 182 | 16.38% | 81.03% | 2.59%  |
| 183 | 10.34% | 84.48% | 5.17%  |
| 184 | 16.38% | 81.03% | 2.59%  |
| 185 | 26.72% | 69.83% | 3.45%  |
| 186 | 30.17% | 67.24% | 2.59%  |
| 187 | 34.48% | 62.93% | 2.59%  |
| 188 | 43.97% | 53.45% | 2.59%  |
| 189 | 50.00% | 45.69% | 4.31%  |
| 190 | 37.07% | 59.48% | 3.45%  |
| 191 | 15.52% | 67.24% | 17.24% |
| 192 | 27.59% | 68.97% | 3.45%  |
| 193 | 3.45%  | 73.28% | 23.28% |
| 194 | 5.17%  | 82.76% | 12.07% |
| 195 | 24.14% | 75.00% | 0.86%  |
| 196 | 16.38% | 75.86% | 7.76%  |
| 197 | 22.41% | 73.28% | 4.31%  |
| 198 | 37.93% | 60.34% | 1.72%  |
| 199 | 16.38% | 75.00% | 8.62%  |
| 200 | 31.03% | 65.52% | 3.45%  |
| 201 | 16.38% | 79.31% | 4.31%  |
| 202 | 28.45% | 57.76% | 13.79% |
| 203 | 25.86% | 59.48% | 14.66% |
| 204 | 4.31%  | 12.93% | 82.76% |
| 205 | 7.76%  | 25.00% | 67.24% |
| 206 | 1.72%  | 7.76%  | 90.52% |
| 207 | 0.86%  | 10.34% | 88.79% |
| 208 | 0.00%  | 15.52% | 84.48% |
| 209 | 0.86%  | 8.62%  | 90.52% |
| 210 | 1.72%  | 6.90%  | 91.38% |
| 211 | 1.72%  | 11.21% | 87.07% |
| 212 | 6.03%  | 18.10% | 75.86% |
| 213 | 8.62%  | 23.28% | 68.10% |
| 214 | 2.59%  | 12.93% | 84.48% |

|     |        |        |        |
|-----|--------|--------|--------|
| 215 | 2.59%  | 18.10% | 79.31% |
| 216 | 3.45%  | 53.45% | 43.10% |
| 217 | 8.62%  | 59.48% | 31.90% |
| 218 | 6.03%  | 70.69% | 23.28% |
| 219 | 14.66% | 35.34% | 50.00% |
| 220 | 23.28% | 29.31% | 47.41% |
| 221 | 6.03%  | 11.21% | 82.76% |
| 222 | 6.03%  | 12.93% | 81.03% |
| 223 | 6.03%  | 12.07% | 81.90% |
| 224 | 3.45%  | 11.21% | 85.34% |
| 225 | 4.31%  | 12.93% | 82.76% |
| 226 | 1.72%  | 15.52% | 82.76% |
| 227 | 1.72%  | 16.38% | 81.90% |
| 228 | 1.72%  | 7.76%  | 90.52% |
| 229 | 3.45%  | 12.93% | 83.62% |
| 230 | 2.59%  | 25.86% | 71.55% |
| 231 | 1.72%  | 24.14% | 74.14% |
| 232 | 3.45%  | 16.38% | 80.17% |
| 233 | 2.59%  | 37.93% | 59.48% |
| 234 | 1.72%  | 16.38% | 81.90% |
| 235 | 6.03%  | 44.83% | 49.14% |
| 236 | 3.45%  | 13.79% | 82.76% |
| 237 | 1.72%  | 10.34% | 87.93% |
| 238 | 3.45%  | 75.86% | 20.69% |
| 239 | 6.90%  | 67.24% | 25.86% |
| 240 | 9.48%  | 66.38% | 24.14% |
| 241 | 6.03%  | 83.62% | 10.34% |
| 242 | 0.86%  | 19.83% | 79.31% |
| 243 | 1.72%  | 16.38% | 81.90% |
| 244 | 5.17%  | 18.97% | 75.86% |
| 245 | 0.00%  | 14.66% | 85.34% |
| 246 | 2.59%  | 12.07% | 85.34% |
| 247 | 1.72%  | 9.48%  | 88.79% |
| 248 | 6.90%  | 29.31% | 63.79% |
| 249 | 2.59%  | 16.38% | 81.03% |
| 250 | 2.59%  | 18.97% | 78.45% |
| 251 | 6.03%  | 15.52% | 78.45% |
| 252 | 4.31%  | 24.14% | 71.55% |
| 253 | 3.45%  | 33.62% | 62.93% |
| 254 | 3.45%  | 26.72% | 69.83% |
| 255 | 5.17%  | 22.41% | 72.41% |
| 256 | 1.72%  | 15.52% | 82.76% |
| 257 | 0.86%  | 17.24% | 81.90% |
| 258 | 0.86%  | 14.66% | 84.48% |



|     |        |        |        |
|-----|--------|--------|--------|
| 259 | 1.72%  | 13.79% | 84.48% |
| 260 | 5.17%  | 25.00% | 69.83% |
| 261 | 2.59%  | 16.38% | 81.03% |
| 262 | 2.59%  | 19.83% | 77.59% |
| 263 | 4.31%  | 20.69% | 75.00% |
| 264 | 3.45%  | 20.69% | 75.86% |
| 265 | 3.45%  | 20.69% | 75.86% |
| 266 | 9.48%  | 22.41% | 68.10% |
| 267 | 2.59%  | 13.79% | 83.62% |
| 268 | 2.59%  | 6.90%  | 90.52% |
| 269 | 3.45%  | 4.31%  | 92.24% |
| 270 | 1.72%  | 16.38% | 81.90% |
| 271 | 0.86%  | 7.76%  | 91.38% |
| 272 | 0.86%  | 2.59%  | 96.55% |
| 273 | 0.00%  | 4.31%  | 95.69% |
| 274 | 6.03%  | 18.97% | 75.00% |
| 275 | 0.86%  | 11.21% | 87.93% |
| 276 | 12.07% | 27.59% | 60.34% |
| 277 | 2.59%  | 11.21% | 86.21% |
| 278 | 0.86%  | 14.66% | 84.48% |
| 279 | 12.93% | 22.41% | 64.66% |
| 280 | 0.00%  | 6.03%  | 93.97% |
| 281 | 4.31%  | 5.17%  | 90.52% |
| 282 | 2.59%  | 4.31%  | 93.10% |
| 283 | 7.76%  | 32.76% | 59.48% |
| 284 | 7.76%  | 24.14% | 68.10% |
| 285 | 16.38% | 12.07% | 71.55% |
| 286 | 3.45%  | 43.97% | 52.59% |
| 287 | 5.17%  | 28.45% | 66.38% |
| 288 | 1.72%  | 10.34% | 87.93% |
| 289 | 6.03%  | 29.31% | 64.66% |
| 290 | 0.86%  | 36.21% | 62.93% |
| 291 | 0.86%  | 10.34% | 88.79% |
| 292 | 1.72%  | 12.07% | 86.21% |
| 293 | 3.45%  | 17.24% | 79.31% |
| 294 | 4.31%  | 4.31%  | 91.38% |
| 295 | 0.86%  | 8.62%  | 90.52% |
| 296 | 3.45%  | 4.31%  | 92.24% |
| 297 | 2.59%  | 15.52% | 81.90% |
| 298 | 3.45%  | 34.48% | 62.07% |
| 299 | 0.86%  | 11.21% | 87.93% |

---

**Table S3. The average recognition scores of each video on three emotion dimensions**

| Number | ID | valence | Arousal | Dominance |
|--------|----|---------|---------|-----------|
| 1      | 1  | 6.38    | 5.81    | 6.27      |
| 2      | 2  | 6.82    | 6.59    | 6.77      |
| 3      | 3  | 6.72    | 6.47    | 6.57      |
| 4      | 4  | 6.16    | 5.76    | 6.12      |
| 5      | 5  | 6.15    | 6.01    | 6.13      |
| 6      | 6  | 6.43    | 6.29    | 6.34      |
| 7      | 12 | 6.03    | 5.67    | 6.04      |
| 8      | 13 | 6.19    | 5.88    | 6.1       |
| 9      | 14 | 6.43    | 6.15    | 6.28      |
| 10     | 15 | 6.47    | 6.24    | 6.42      |
| 11     | 16 | 5.96    | 5.58    | 5.96      |
| 12     | 21 | 6.54    | 6.26    | 6.44      |
| 13     | 22 | 6.65    | 6.38    | 6.6       |
| 14     | 23 | 6.4     | 6.2     | 6.36      |
| 15     | 24 | 6.07    | 5.92    | 6.05      |
| 16     | 25 | 6.46    | 6.26    | 6.49      |
| 17     | 26 | 6.49    | 6.21    | 6.45      |
| 18     | 27 | 6.59    | 6.33    | 6.51      |
| 19     | 28 | 6.78    | 6       | 6.69      |
| 20     | 29 | 6.29    | 5.99    | 6.12      |
| 21     | 30 | 6.57    | 6.25    | 6.45      |
| 22     | 31 | 6.54    | 6.28    | 6.56      |
| 23     | 32 | 6.35    | 6.07    | 6.2       |
| 24     | 33 | 6.57    | 6.27    | 6.47      |
| 25     | 35 | 6.1     | 5.8     | 6.12      |
| 26     | 36 | 6.44    | 6.37    | 6.51      |
| 27     | 38 | 5.95    | 5.54    | 5.85      |
| 28     | 40 | 6.22    | 5.8     | 6.33      |
| 29     | 41 | 6.03    | 5.71    | 6.05      |
| 30     | 42 | 6.32    | 5.79    | 6.27      |
| 31     | 43 | 6.15    | 5.77    | 6         |
| 32     | 47 | 6.15    | 5.73    | 5.99      |
| 33     | 48 | 6.25    | 5.87    | 6.22      |
| 34     | 49 | 6.1     | 5.62    | 5.94      |
| 35     | 50 | 6.14    | 5.77    | 6.06      |
| 36     | 51 | 6.54    | 5.99    | 6.47      |
| 37     | 52 | 6.13    | 5.74    | 6.11      |
| 38     | 53 | 6.28    | 5.93    | 6.25      |
| 39     | 54 | 6.2     | 5.86    | 6.09      |
| 40     | 56 | 6.35    | 5.85    | 6.23      |

|    |     |      |      |      |
|----|-----|------|------|------|
| 41 | 57  | 6.25 | 5.85 | 6.2  |
| 42 | 58  | 5.96 | 5.66 | 5.97 |
| 43 | 59  | 6.11 | 5.66 | 6.08 |
| 44 | 60  | 6.48 | 6.04 | 6.46 |
| 45 | 61  | 6.11 | 5.61 | 6.08 |
| 46 | 62  | 6.88 | 6.49 | 6.86 |
| 47 | 63  | 6.73 | 6.26 | 6.62 |
| 48 | 65  | 6.37 | 6    | 6.24 |
| 49 | 67  | 6.08 | 5.78 | 6.12 |
| 50 | 68  | 6.48 | 6.02 | 6.37 |
| 51 | 69  | 6.19 | 5.9  | 6.23 |
| 52 | 70  | 6.7  | 6.24 | 6.52 |
| 53 | 71  | 6.41 | 6.09 | 6.34 |
| 54 | 72  | 5.99 | 5.73 | 6.01 |
| 55 | 73  | 6.13 | 5.73 | 6.05 |
| 56 | 74  | 6.37 | 6.12 | 6.31 |
| 57 | 75  | 6.29 | 5.99 | 6.27 |
| 58 | 76  | 6.38 | 6.34 | 6.39 |
| 59 | 77  | 6.11 | 6.16 | 6.13 |
| 60 | 78  | 6.21 | 6.03 | 6.1  |
| 61 | 79  | 6.47 | 6.13 | 6.33 |
| 62 | 80  | 6.09 | 6.09 | 5.99 |
| 63 | 81  | 5.9  | 5.61 | 5.85 |
| 64 | 82  | 6.25 | 5.8  | 6.18 |
| 65 | 85  | 6.07 | 5.77 | 6.08 |
| 66 | 86  | 6.33 | 5.8  | 6.37 |
| 67 | 88  | 6.06 | 5.65 | 6.1  |
| 68 | 90  | 6.43 | 5.85 | 6.25 |
| 69 | 91  | 6.25 | 5.81 | 6    |
| 70 | 92  | 6.05 | 5.66 | 5.97 |
| 71 | 93  | 6.18 | 5.93 | 6.19 |
| 72 | 94  | 6.1  | 5.67 | 6    |
| 73 | 95  | 6.05 | 5.66 | 5.99 |
| 74 | 96  | 6.23 | 5.8  | 6.06 |
| 75 | 98  | 6.52 | 6.36 | 6.36 |
| 76 | 99  | 6.49 | 6.11 | 6.44 |
| 77 | 100 | 6.67 | 6.43 | 6.7  |
| 78 | 101 | 6.59 | 6.23 | 6.59 |
| 79 | 102 | 6.33 | 6.05 | 6.36 |
| 80 | 103 | 6.35 | 5.92 | 6.22 |
| 81 | 105 | 6.44 | 5.99 | 6.32 |
| 82 | 106 | 6.42 | 6.09 | 6.36 |
| 83 | 107 | 6.12 | 6.13 | 6.13 |
| 84 | 108 | 6.42 | 5.89 | 6.41 |

|     |     |      |      |      |
|-----|-----|------|------|------|
| 85  | 109 | 6.39 | 6.1  | 6.37 |
| 86  | 110 | 6.87 | 6.4  | 6.75 |
| 87  | 111 | 6.62 | 6.21 | 6.46 |
| 88  | 112 | 6.91 | 6.71 | 6.91 |
| 89  | 113 | 6.9  | 6.52 | 6.67 |
| 90  | 114 | 6.66 | 6.56 | 6.72 |
| 91  | 115 | 6.85 | 6.51 | 6.77 |
| 92  | 116 | 6.29 | 6.04 | 6.27 |
| 93  | 117 | 6.16 | 5.89 | 6.13 |
| 94  | 118 | 6.75 | 6.49 | 6.68 |
| 95  | 119 | 6.24 | 5.98 | 6.11 |
| 96  | 120 | 6.38 | 6.3  | 6.31 |
| 97  | 121 | 6.38 | 6.22 | 6.36 |
| 98  | 122 | 6.37 | 6.08 | 6.32 |
| 99  | 123 | 6.43 | 6.2  | 6.41 |
| 100 | 124 | 6.82 | 6.69 | 6.87 |
| 101 | 125 | 6.07 | 6.16 | 5.89 |
| 102 | 126 | 7    | 6.74 | 6.93 |
| 103 | 127 | 6.87 | 6.75 | 6.87 |
| 104 | 128 | 6.6  | 6.27 | 6.66 |
| 105 | 129 | 6.95 | 6.27 | 6.95 |
| 106 | 132 | 5.41 | 4.95 | 5.45 |
| 107 | 133 | 5.34 | 5.25 | 5.54 |
| 108 | 134 | 5.33 | 5.18 | 5.36 |
| 109 | 135 | 5.45 | 5.23 | 5.44 |
| 110 | 136 | 5.4  | 5.28 | 5.4  |
| 111 | 137 | 5.05 | 5.04 | 5.05 |
| 112 | 138 | 5.27 | 5.1  | 5.31 |
| 113 | 139 | 5.34 | 5.11 | 5.35 |
| 114 | 140 | 5.09 | 4.93 | 5.01 |
| 115 | 141 | 5.04 | 4.89 | 4.96 |
| 116 | 142 | 5.11 | 4.93 | 4.97 |
| 117 | 143 | 5.4  | 5.26 | 5.43 |
| 118 | 144 | 5.34 | 4.98 | 5.39 |
| 119 | 145 | 5.34 | 5.11 | 5.33 |
| 120 | 146 | 5.32 | 5.15 | 5.27 |
| 121 | 147 | 4.9  | 5.26 | 4.98 |
| 122 | 149 | 5.1  | 5.26 | 5.18 |
| 123 | 152 | 5.03 | 5.23 | 5.01 |
| 124 | 156 | 5.36 | 5.22 | 5.32 |
| 125 | 161 | 6.12 | 5.81 | 6.04 |
| 126 | 164 | 6.16 | 5.67 | 6.07 |
| 127 | 167 | 5.49 | 5.24 | 5.48 |
| 128 | 170 | 5.53 | 5.14 | 5.47 |

|     |     |      |      |      |
|-----|-----|------|------|------|
| 129 | 172 | 5.11 | 4.96 | 5.08 |
| 130 | 173 | 5.13 | 5.09 | 5.2  |
| 131 | 175 | 5.03 | 4.99 | 5.01 |
| 132 | 176 | 5.25 | 5.26 | 5.21 |
| 133 | 177 | 5.07 | 5.06 | 5.04 |
| 134 | 178 | 5.08 | 4.97 | 5.02 |
| 135 | 179 | 5.15 | 4.86 | 5.09 |
| 136 | 180 | 5.27 | 5.18 | 5.22 |
| 137 | 181 | 5.3  | 5.26 | 5.35 |
| 138 | 182 | 5.2  | 5.05 | 5.18 |
| 139 | 183 | 5.09 | 5.04 | 5.06 |
| 140 | 184 | 5.26 | 5.11 | 5.25 |
| 141 | 185 | 5.41 | 5.28 | 5.4  |
| 142 | 186 | 5.45 | 5.24 | 5.43 |
| 143 | 187 | 5.54 | 5.39 | 5.55 |
| 144 | 191 | 4.92 | 5.02 | 4.95 |
| 145 | 192 | 5.35 | 5.1  | 5.41 |
| 146 | 193 | 4.79 | 5.02 | 4.63 |
| 147 | 194 | 4.94 | 5.16 | 4.8  |
| 148 | 195 | 5.23 | 5.11 | 5.23 |
| 149 | 196 | 5.05 | 4.72 | 5.14 |
| 150 | 197 | 5.2  | 5    | 5.31 |
| 151 | 199 | 5.03 | 5.04 | 4.92 |
| 152 | 200 | 5.41 | 5.23 | 5.44 |
| 153 | 201 | 5.16 | 5    | 5.1  |
| 154 | 203 | 5.09 | 5.22 | 5.14 |
| 155 | 204 | 3.43 | 6.19 | 3.38 |
| 156 | 205 | 3.53 | 5.66 | 3.74 |
| 157 | 206 | 2.81 | 5.49 | 2.91 |
| 158 | 207 | 2.84 | 5.85 | 3.02 |
| 159 | 208 | 3.02 | 5.62 | 3.15 |
| 160 | 209 | 2.66 | 5.75 | 2.76 |
| 161 | 210 | 3.31 | 4.94 | 3.58 |
| 162 | 211 | 3.2  | 5.07 | 3.42 |
| 163 | 212 | 3.33 | 5.77 | 3.41 |
| 164 | 213 | 3.74 | 5.42 | 3.69 |
| 165 | 214 | 3.4  | 5.22 | 3.53 |
| 166 | 215 | 3.43 | 5.07 | 3.55 |
| 167 | 218 | 4.76 | 4.86 | 4.82 |
| 168 | 221 | 3.26 | 6.12 | 3.25 |
| 169 | 222 | 3.29 | 5.82 | 3.34 |
| 170 | 223 | 3.58 | 6.21 | 3.53 |
| 171 | 224 | 3.19 | 6.24 | 3.24 |
| 172 | 225 | 3.38 | 6.11 | 3.26 |

|     |     |      |      |      |
|-----|-----|------|------|------|
| 173 | 226 | 3.22 | 6.29 | 3.23 |
| 174 | 227 | 2.96 | 6.6  | 2.8  |
| 175 | 228 | 2.91 | 6.4  | 2.87 |
| 176 | 229 | 3.18 | 6.18 | 3.08 |
| 177 | 230 | 3.77 | 4.85 | 3.96 |
| 178 | 231 | 3.46 | 5.25 | 3.63 |
| 179 | 232 | 3.11 | 5.51 | 3.31 |
| 180 | 233 | 3.88 | 4.99 | 4.04 |
| 181 | 234 | 3.22 | 5.21 | 3.43 |
| 182 | 236 | 3.06 | 6.28 | 3.15 |
| 183 | 237 | 2.99 | 6.56 | 2.88 |
| 184 | 238 | 4.79 | 4.94 | 4.75 |
| 185 | 239 | 4.7  | 5.08 | 4.66 |
| 186 | 240 | 4.93 | 5.2  | 4.87 |
| 187 | 241 | 4.92 | 5.06 | 4.95 |
| 188 | 242 | 3.1  | 5.58 | 3.23 |
| 189 | 243 | 3.08 | 5.74 | 3.22 |
| 190 | 244 | 3.22 | 5.91 | 3.33 |
| 191 | 245 | 2.7  | 5.97 | 2.86 |
| 192 | 246 | 2.64 | 5.89 | 2.84 |
| 193 | 247 | 2.7  | 5.93 | 2.91 |
| 194 | 248 | 3.76 | 5.22 | 3.75 |
| 195 | 249 | 3.23 | 5.65 | 3.37 |
| 196 | 250 | 3.32 | 5.3  | 3.4  |
| 197 | 251 | 3.26 | 5.73 | 3.3  |
| 198 | 252 | 3.67 | 5.57 | 3.7  |
| 199 | 253 | 3.85 | 5.18 | 3.89 |
| 200 | 254 | 3.62 | 5.45 | 3.72 |
| 201 | 255 | 3.44 | 5.27 | 3.53 |
| 202 | 256 | 3.2  | 5.3  | 3.31 |
| 203 | 257 | 3.08 | 5.85 | 3.24 |
| 204 | 258 | 3.14 | 5.72 | 3.2  |
| 205 | 259 | 3.18 | 5.51 | 3.3  |
| 206 | 260 | 3.89 | 5.23 | 3.97 |
| 207 | 261 | 3.41 | 5.32 | 3.56 |
| 208 | 262 | 3.54 | 5.39 | 3.66 |
| 209 | 263 | 3.84 | 5.1  | 3.88 |
| 210 | 264 | 3.8  | 5.09 | 3.95 |
| 211 | 265 | 3.16 | 6.26 | 3.25 |
| 212 | 266 | 3.4  | 5.99 | 3.31 |
| 213 | 267 | 2.7  | 6.74 | 2.62 |
| 214 | 268 | 2.43 | 6.56 | 2.44 |
| 215 | 269 | 2.28 | 6.68 | 2.26 |
| 216 | 270 | 2.68 | 5.91 | 2.73 |

|     |     |      |      |      |
|-----|-----|------|------|------|
| 217 | 271 | 2.46 | 6.26 | 2.37 |
| 218 | 272 | 2.22 | 6.34 | 2.34 |
| 219 | 273 | 1.94 | 6.71 | 1.98 |
| 220 | 274 | 2.92 | 6.26 | 2.98 |
| 221 | 275 | 3.09 | 5.88 | 3.32 |
| 222 | 276 | 3.84 | 5.55 | 3.85 |
| 223 | 277 | 2.77 | 6.26 | 2.97 |
| 224 | 278 | 2.68 | 6.45 | 2.86 |
| 225 | 279 | 3.71 | 5.82 | 3.75 |
| 226 | 280 | 2.54 | 6.13 | 2.73 |
| 227 | 281 | 2.33 | 5.62 | 2.65 |
| 228 | 282 | 2.48 | 5.33 | 2.89 |
| 229 | 283 | 3.98 | 5.64 | 4.02 |
| 230 | 284 | 3.66 | 5.89 | 3.66 |
| 231 | 285 | 3.58 | 5.22 | 3.91 |
| 232 | 287 | 4.05 | 4.91 | 3.94 |
| 233 | 288 | 2.82 | 5.78 | 3.08 |
| 234 | 289 | 3.59 | 6.45 | 3.46 |
| 235 | 290 | 4.1  | 5.26 | 3.97 |
| 236 | 291 | 2.66 | 6.34 | 2.65 |
| 237 | 292 | 3.19 | 5.84 | 3.05 |
| 238 | 293 | 3.48 | 5.68 | 3.45 |
| 239 | 294 | 2.85 | 5.9  | 3.13 |
| 240 | 295 | 2.54 | 6.6  | 2.64 |
| 241 | 296 | 2.66 | 6.68 | 2.64 |
| 242 | 297 | 2.76 | 6.35 | 2.64 |
| 243 | 298 | 3.96 | 4.81 | 4.23 |
| 244 | 299 | 3.26 | 5    | 3.49 |

---

**Table S4. Internal consistency reliability for each type and dimension**

|          | Valence | Arousal | Dominance |
|----------|---------|---------|-----------|
| Total    | 0.98    | 0.99    | 0.98      |
| Positive | 0.99    | 0.99    | 0.99      |
| Neutral  | 0.91    | 0.94    | 0.91      |
| Negative | 0.97    | 0.98    | 0.98      |



**Table S5. Internal consistency reliability for each category and dimension**

|                        | Valence | Arousal | Dominance |
|------------------------|---------|---------|-----------|
| People and human faces | 0.91    | 0.96    | 0.92      |
| Animals                | 0.93    | 0.97    | 0.93      |
| Objects                | 0.80    | 0.88    | 0.80      |
| Landscapes             | 0.93    | 0.94    | 0.94      |

**Table S6. Criteria validity of short videos in four categories**

|                 | Valance             | Arousal             | Dominance           |
|-----------------|---------------------|---------------------|---------------------|
| All videos      | 0.901 <sup>**</sup> | 0.607 <sup>**</sup> | 0.892 <sup>**</sup> |
| People and face | 0.756 <sup>**</sup> | -0.092              | 0.770 <sup>**</sup> |
| Animal          | 0.567               | -0.250              | 0.650               |
| Object          | 0.601 <sup>**</sup> | 0.451 <sup>*</sup>  | 0.515 <sup>*</sup>  |
| Landscape       | 0.900 <sup>*</sup>  | -0.684              | 0.900 <sup>*</sup>  |
